# Supplementary material
Source: PubMed Central journal article supplement (PMC298702)

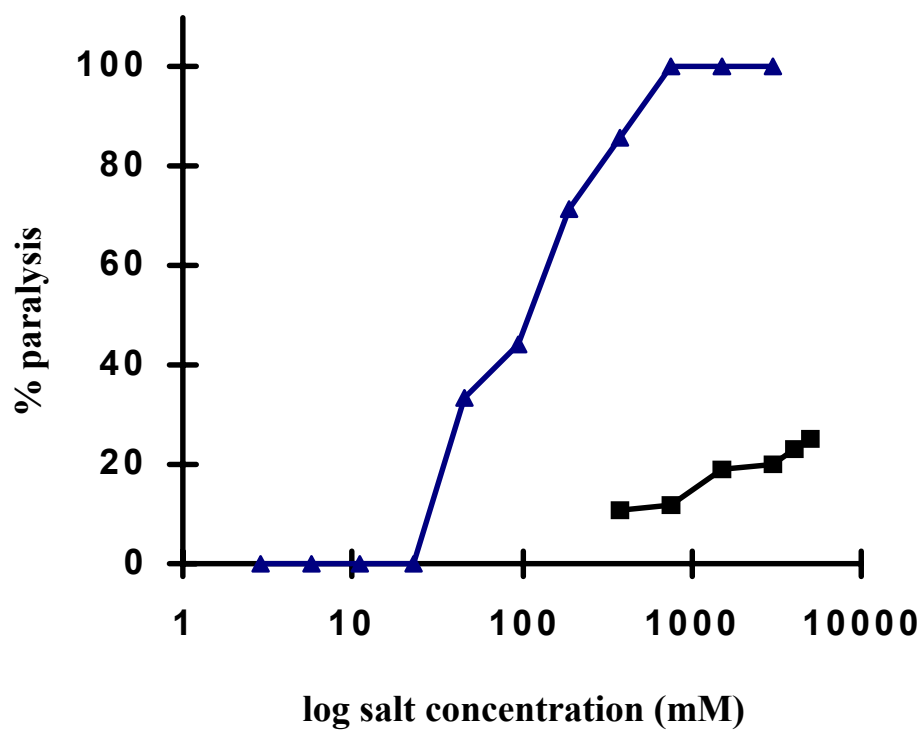

Supplement: pnas_242735499_2.pdf [file pnas_242735499_2.pdf]
